# Supplementary material for: Plasticity of the Cuticular Transpiration Barrier in Response to Water Shortage and Resupply in Camellia sinensis: A Role of Cuticular Waxes
Source: Front Plant Sci. 2021 Jan 11;11:600069. doi: 10.3389/fpls.2020.600069 (PMC7829210; doi:10.3389/fpls.2020.600069)
Supplement: Supplementary file 2 [file Table_1.XLSX]

## Sheet: Sheet1
Supplemental Table: Detailed wax composition of tea leaves (µg/cm2).
	Group	Control group
	Variety	Wuniuzao																								0202-10
	Leaf surface	Adaxial												Abaxial												Adaxial												Abaxial
	Wax layer	Epicuticular wax						Intracuticular wax						Epicuticular wax						Intracuticular wax						Epicuticular wax						Intracuticular wax						Epicuticular wax						Intracuticular wax
	Biological replicate	1	2	3	4	Mean	SE	1	2	3	4	Mean	SE	1	2	3	4	Mean	SE	1	2	3	4	Mean	SE	1	2	3	4	Mean	SE	1	2	3	4	Mean	SE	1	2	3	4	Mean	SE	1	2	3	4	Mean	SE
Acides	C16	0.0265955	0.0173695	0.0387471	0.0277245	0.0276091	0.00437746	0.0174617	0.0210599	0.0211197	0.0211685	0.0202024	0.000913848	0.0351905	0.038196	0.0517115	0.0618076	0.0467264	0.00617885	0.0114469	0.0129412	0.0175255	0.0204883	0.0156005	0.00208009	0.0263332	0.0257658	0.021961	0.0297922	0.025963	0.0016035	0.0161845	0.0232793	0.0156208	0.0204566	0.0188853	0.00181952	0.0217132	0.0447882	0.0258856	0.0398711	0.0330645	0.00550879	0.0188195	0.0244808	0.0178415	0.0284254	0.0223918	0.00248721
	C18	0.0140051	0.0140051	0.0126262	0.015384	0.0140051	0.000562926	0.0118171	0.0155255	0.0160028	0.0187566	0.0155255	0.00142654	0.0218956	0.0413414	0.0428325	0.059296	0.0413414	0.0076525	0.00732498	0.00742525	0.0132989	0.0153083	0.0108393	0.0020418	0.0184531	0.0146618	0.0129897	0.0277079	0.0184531	0.00328979	0.00723536	0.0164885	0.0089557	0.0135478	0.0115568	0.00211594	0.0195561	0.0351168	0.0198026	0.0332206	0.026924	0.00420088	0.0139893	0.0154016	0.0148222	0.0225221	0.0166838	0.00196754
	C24	0.00090625	0.000700313	0.000687087	0.000507603	0.000700313	8.15078e-05	0.000663211	0.000663211	0.000752069	0.000574353	0.000663211	3.6276e-05	0.000877482	0.000652752	0.00134097	0.000842131	0.000928333	0.000146124	0	0	0	0	0	0	0	0	0	0	0	0	0	0	0	0	0	0	0	0	0	0	0	0	0	0	0	0	0	0
	C26	0.00825884	0.00592928	0.00522411	0.0043049	0.00592928	0.000844726	0.00870313	0.00282624	0.00521695	0.00257811	0.00483111	0.00142118	0.00213936	0.00100674	0.00218816	0.00322316	0.00213936	0.000452754	0.0048908	0.00253272	0.0018031	0.00153998	0.00269165	0.000762526	0.0140303	0.0119876	0.01148	0.0124993	0.0124993	0.00055112	0.00807645	0.00840117	0.0104073	0.0147443	0.0104073	0.0015348	0.00241919	0.00360619	0.00347571	0.00500019	0.00362532	0.000529763	0.00365976	0.00215841	0.00290478	0.00290765	0.00290765	0.000306464
	C28	0.00540875	0.00308036	0.0074765	0.0103117	0.00656934	0.001537	0.0112426	0.0054261	0.00639432	0.00496444	0.00700687	0.00144301	0.00813322	0.00688855	0.00538325	0.00714917	0.00688855	0.000568848	0.00711369	0.00463828	0.00459516	0.00398618	0.00508333	0.000692968	0.0242225	0.0232124	0.0221928	0.0232092	0.0232092	0.000414311	0.0116247	0.0116165	0.00866483	0.0106354	0.0106354	0.00069669	0.00628706	0.00831526	0.0105838	0.011227	0.00910326	0.00112746	0.00576238	0.00494407	0.00498755	0.00523133	0.00523133	0.000187962
	Subtotal	0.0551744	0.0410846	0.0647611	0.0582327	0.0548132	0.00499382	0.0498878	0.0455009	0.0494858	0.048042	0.0482291	0.000991987	0.0682361	0.0880854	0.103456	0.132318	0.098024	0.0135145	0.0307763	0.0275374	0.0372226	0.0413228	0.0342148	0.00310888	0.0830391	0.0756276	0.0686234	0.0932085	0.0801247	0.00526136	0.043121	0.0597856	0.0436487	0.0593842	0.0514849	0.0046785	0.0499756	0.0918264	0.0597477	0.0893188	0.0727171	0.0105125	0.042231	0.0469849	0.0405561	0.0590864	0.0472146	0.00418495
Aldehydes	C26	0.00338116	0.00186034	0.00118693	0.00103779	0.00186656	0.000535631	0.00081028	0.000863191	0.00111813	0.000661166	0.000863191	9.51346e-05	0	0	0	0	0	0	0.00094928	0.000621848	0.000474961	0.00068203	0.00068203	9.91303e-05	0.00141812	0.00221067	0.00171236	0.00178038	0.00178038	0.000163557	0	0	0	0	0	0	0	0	0	0	0	0	0	0	0	0	0	0
	C28	0.0015427	0.00122492	0.00163541	0.00176776	0.0015427	0.000115553	0.000544685	0.000544685	0.000613263	0.000476106	0.000544685	2.7997e-05	0	0	0	0	0	0	0.000658204	0.00146236	0.00106028	0.00106028	0.00106028	0.000164148	0.00166973	0.00413586	0.00200932	0.00351511	0.0028325	0.000591211	0.000988699	0.00116754	0.00128582	0.000731975	0.00104351	0.000120471	0.00101404	0.00213365	0.00156719	0.00155388	0.00156719	0.000228586	0.00116784	0.000940737	0.000713637	0.000940737	0.000940737	9.27134e-05
	C30	0.00745539	0.00904314	0.00611612	0.00720691	0.00745539	0.000603899	0.00388532	0.00356761	0.00474642	0.00435022	0.00413739	0.00025891	0.00436371	0.00517063	0.00498152	0.00616668	0.00517063	0.000374054	0.00830188	0.00688353	0.00501335	0.00499922	0.0062995	0.00080081	0.00812781	0.0109162	0.0124014	0.0190509	0.0126241	0.00231816	0.00360302	0.00265646	0.00297397	0.00307782	0.00307782	0.000196671	0.00390563	0.00422764	0.00655633	0.00489653	0.00489653	0.000590497	0.00516598	0.00385256	0.00375732	0.0063065	0.00477059	0.000604485
	Subtotal	0.0123792	0.0121284	0.00893846	0.0100125	0.0108646	0.000833042	0.00524028	0.00497548	0.00647782	0.00548749	0.00554527	0.000327955	0.00436371	0.00517063	0.00498152	0.00616668	0.00517063	0.000374054	0.00990937	0.00896774	0.00654859	0.00674153	0.00804181	0.000829937	0.0112157	0.0172627	0.0161231	0.0243464	0.017237	0.00270865	0.00459171	0.003824	0.0042598	0.00380979	0.00412133	0.000188391	0.00491967	0.00636128	0.00812352	0.00645041	0.00646372	0.000655089	0.00633382	0.0047933	0.00447096	0.00724724	0.00571133	0.000653694
1-Alkanols	C18	0.00221691	0.00221691	0.00214799	0.00228583	0.00221691	2.81364e-05	0.00522688	0.00292356	0.0032651	0.00266656	0.00352053	0.000581844	0.00353541	0.00222024	0.0034778	0.00189044	0.00278097	0.000424479	0.00440297	0.00298373	0.00375503	0.00341382	0.00363889	0.000299611	0.00394664	0.00403985	0.00351433	0.00428574	0.00394664	0.000160874	0.00424271	0.00334961	0.0027603	0.00363871	0.00349783	0.000308305	0.00277371	0.0027415	0.00370553	0.00297847	0.0030498	0.000224785	0.00561991	0.00237883	0.0042121	0.00389197	0.0040257	0.000664975
	C24	0.00176059	0.00130325	0.00166052	0.00132631	0.00151267	0.000116158	0.00107245	0.00107084	0.00124328	0.00094844	0.00108375	6.05897e-05	0	0	0	0	0	0	0	0	0	0	0	0	0.000937292	0.000908449	0.000940988	0.00105706	0.000960948	3.28535e-05	0.00154625	0.0020613	0.00182321	0.00153428	0.00174126	0.000125834	0	0	0	0	0	0	0	0	0	0	0	0
	C26	0.0170256	0.00528757	0.00871679	0.00918272	0.0100532	0.00248108	0.00779581	0.00393351	0.00718198	0.00440673	0.00582951	0.000971023	0.00309041	0.00104546	0.00218056	0.00212162	0.00210951	0.000418286	0.00324158	0.0021684	0.00199129	0.0012799	0.00217029	0.000405431	0.0112325	0.0118352	0.0112988	0.0114555	0.0114555	0.000134909	0.00771021	0.0103236	0.00719952	0.0171552	0.0105971	0.00229058	0.00101551	0.00178363	0.00159767	0.00209793	0.00162368	0.000227496	0.00164556	0.00148063	0.00123394	0.00145338	0.00145338	8.45706e-05
	C28	0.047408	0.0262292	0.0422043	0.0542464	0.042522	0.00596441	0.0398979	0.0279021	0.0418625	0.0344142	0.0360192	0.00313119	0.0115143	0.0116864	0.0120448	0.0115001	0.0116864	0.000126752	0.0189812	0.0161933	0.0129958	0.00903917	0.0143024	0.00213844	0.0874598	0.0929023	0.0890957	0.0900313	0.0898722	0.00114124	0.0451923	0.0608663	0.0510339	0.0513318	0.0521061	0.00324412	0.00836725	0.012192	0.0137175	0.0171595	0.0128591	0.00182237	0.0139542	0.0148326	0.00983242	0.021582	0.0150503	0.00243478
	C30	0.00585085	0.00245117	0.00106904	0.00145975	0.0027077	0.00108734	0.00378621	0.00326438	0.00503903	0.0038605	0.00398753	0.000374752	0.000986298	0.000823087	0.00137749	0.00121686	0.00110093	0.000122563	0.00540305	0.00586358	0.00860215	0.00550038	0.00634229	0.000759775	0.00319197	0.00350011	0.00533541	0.00463515	0.00416566	0.000498311	0.00227233	0.00125547	0.00163431	0.00157724	0.00168484	0.000212845	0.00170624	0.000972653	0.00139262	0.00149896	0.00139262	0.000154391	0.00562959	0.00562997	0.00469462	0.0028243	0.00469462	0.000661257
	C32	0.00505752	0.00530091	0.00743743	0.00714368	0.00623488	0.000614446	0.00921784	0.00933022	0.00977083	0.00843954	0.0091896	0.000277037	0.00803046	0.012093	0.0163099	0.0119386	0.012093	0.00169092	0.0155817	0.0290126	0.0414946	0.0395278	0.0314042	0.00594333	0.0265719	0.0223634	0.027723	0.0357999	0.0281146	0.00280882	0.0223048	0.0225589	0.0244549	0.0300118	0.0248326	0.00179179	0.0162698	0.0143547	0.0206356	0.0196348	0.0177237	0.00146047	0.0451308	0.052817	0.0291189	0.0335369	0.0401509	0.00540586
	Subtotal	0.0793195	0.042789	0.063236	0.0756446	0.0652473	0.00823889	0.0669971	0.0484246	0.0683627	0.0547359	0.0596301	0.00483087	0.0271569	0.0278682	0.0353906	0.0286676	0.0297708	0.0018985	0.0476105	0.0562216	0.0688389	0.058761	0.057858	0.00436924	0.13334	0.135549	0.137908	0.147265	0.138516	0.00306186	0.0832686	0.100415	0.0889062	0.105249	0.0944598	0.0050659	0.0301325	0.0320445	0.0410489	0.0433697	0.0366489	0.00326846	0.0719801	0.0771391	0.049092	0.0632885	0.0653749	0.00613399
Alkanes	C17	0.000662351	0.000682766	0.000872764	0.000602189	0.000705018	5.84723e-05	0.000750688	0.000736821	0.00086403	0.0008267	0.00079456	3.04378e-05	0.000780515	0.000551868	0.000820522	0.000688699	0.000710401	5.96143e-05	0.00140875	0.000553596	0.00117917	0.00103247	0.0010435	0.000180726	0.00146782	0.00116755	0.000747511	0.00128732	0.00116755	0.000153008	0	0	0	0	0	0	0	0	0	0	0	0	0.0011956	0.000974914	0.000767651	0.00150041	0.00110964	0.000156843
	C19	0	0	0	0	0	0	0.0007253	0.000679931	0.000679931	0.000634562	0.000679931	1.85219e-05	0	0	0	0	0	0	0.00163104	0.000469262	0.000939906	0.000719415	0.000939906	0.000249631	0	0	0	0	0	0	0	0	0	0	0	0	0	0	0	0	0	0	0	0	0	0	0	0
	C21	0.0033814	0.00150774	0.005041	0.00619764	0.00403195	0.00102075	0.00340077	0.00216874	0.00478924	0.00394778	0.00357663	0.000549337	0.00280157	0.00541537	0.00680997	0.00663456	0.00541537	0.000924811	0.0030869	0.001774	0.00368147	0.0027246	0.00281674	0.00039964	0.00471565	0.0027659	0.0038897	0.00412375	0.00387375	0.000408135	0.00404716	0.00641751	0.00271569	0.0038034	0.00424594	0.000779568	0.0020648	0.00402883	0.00266997	0.00297419	0.00293445	0.000410841	0.00244731	0.00333988	0.0032431	0.00362887	0.00316479	0.000252807
	C25	0.0215264	0.0230778	0.0355806	0.0370682	0.0293132	0.00407159	0.0122069	0.0103277	0.0184261	0.0176224	0.0146458	0.00199467	0.0110313	0.0214411	0.026186	0.0271059	0.0214411	0.00368519	0.00546209	0.00448426	0.0108359	0.00935977	0.0075355	0.00152287	0.0228069	0.0205668	0.0198604	0.0239795	0.0218034	0.000959472	0.0103017	0.0175981	0.0096639	0.0137033	0.0128167	0.00182377	0.0120635	0.0159432	0.00828429	0.0119628	0.0120635	0.00156378	0.00435075	0.00835794	0.00575543	0.00743902	0.00647579	0.000889991
	C27	0.00882808	0.00795657	0.0207791	0.0209427	0.0146266	0.00360392	0.00499037	0.00354548	0.0122778	0.0118521	0.00816646	0.00227172	0.00956418	0.00658375	0.024471	0.0252283	0.0164618	0.00488324	0.00274314	0.00249123	0.00955519	0.00813458	0.00573104	0.00182175	0.00931787	0.00652029	0.00705689	0.0100033	0.00822458	0.000847895	0.00648083	0.00970983	0.0039048	0.00582786	0.00648083	0.00120723	0.010382	0.0142208	0.00659434	0.0103308	0.010382	0.00155685	0.00550061	0.00438268	0.00522958	0.0050614	0.00504357	0.000238147
	C29	0.133624	0.124087	0.144541	0.10405	0.126575	0.00859273	0.0834604	0.0608469	0.059584	0.0497412	0.0634081	0.0071301	0.0152843	0.011925	0.0279963	0.02793	0.0207839	0.00420131	0.0294762	0.0181666	0.0154319	0.0139749	0.0192624	0.0035137	0.0678218	0.0825705	0.075873	0.128329	0.0886485	0.013566	0.0544404	0.0548688	0.043234	0.0734377	0.0564952	0.00625682	0.0185461	0.0205302	0.0159078	0.0192003	0.0185461	0.000971478	0.0141945	0.0163804	0.0171071	0.0223575	0.0175099	0.00173033
	C31	0.0137873	0.015854	0.0184156	0.0153593	0.015854	0.000960809	0.00452628	0.00279797	0.00935659	0.00935145	0.00650807	0.00168056	0.00782184	0.00828655	0.019004	0.0190423	0.0135387	0.0031679	0.00238236	0.00215237	0.00746446	0.00629613	0.00457383	0.00135364	0.00705053	0.00515008	0.00497717	0.00854094	0.00642968	0.000846071	0.00217449	0.00710111	0.00335353	0.00498413	0.00440331	0.00106791	0.00295177	0.00511952	0.00490664	0.00750014	0.00511952	0.000931476	0.00148282	0.0047132	0.0034748	0.00422838	0.0034748	0.00071119
	C35	0.00144754	0.00144754	0.00122888	0.00166619	0.00144754	8.92659e-05	0.000903757	0.000864815	0.00127693	0.000413758	0.000864815	0.000176731	0	0	0	0	0	0	0.00205648	0.00139111	0.00129664	0.000812378	0.00138915	0.000256021	0.0033649	0.00507639	0.00196015	0.00305814	0.0033649	0.00064528	0.00550183	0.00382269	0.00274663	0.00402372	0.00402372	0.000566875	0.00236882	0.00272962	0.00154761	0.00209733	0.00218584	0.000249057	0.00340024	0.00204248	0.00200201	0.00185086	0.0023239	0.000361142
	Subtotal	0.183257	0.174613	0.226459	0.185886	0.192554	0.0115553	0.110964	0.0819683	0.107255	0.09439	0.0986444	0.00659616	0.0472837	0.0542036	0.105288	0.10663	0.0783512	0.0160041	0.048247	0.0314824	0.0503847	0.0430543	0.0432921	0.0042267	0.116545	0.123817	0.114365	0.179322	0.133512	0.0154029	0.0829464	0.0995181	0.0656186	0.10578	0.0884658	0.00901108	0.0483769	0.0625722	0.0399107	0.0540655	0.0512313	0.00476929	0.0325718	0.0401915	0.0375797	0.0460664	0.0391023	0.00280847
1-Alkanol ester	C22	0.00223047	0.00197582	0.00267203	0.001267	0.00203633	0.000294015	0.00228417	0.00265332	0.00229745	0.00190174	0.00228417	0.000153488	0.00248168	0.00226799	0.0027587	0.00250279	0.00250279	0.000100442	0.00397661	0.00204997	0.00234358	0.00178921	0.00253984	0.000492126	0.00243702	0.00216445	0.00196501	0.0031816	0.00243702	0.000266378	0.00169565	0.00166295	0.00155997	0.00186405	0.00169565	6.3137e-05	0.0029801	0.00144686	0.00232161	0.00159584	0.0020861	0.000353987	0.00393456	0.00216787	0.00278536	0.00226918	0.00278924	0.000405003
Glycol ester	C18	0.00266411	0.00221556	0.00194469	0.00203787	0.00221556	0.000159725	0.00529348	0.00454711	0.0050126	0.00392079	0.00469349	0.000300045	0.00377396	0.00269986	0.00257927	0.00270458	0.00293942	0.000279687	0.00434752	0.00466568	0.00398324	0.00405428	0.00426268	0.000155758	0.00684401	0.0054683	0.00433307	0.00608139	0.00568169	0.000530335	0.00610659	0.00620734	0.005196	0.00642234	0.00598307	0.000270492	0.00640525	0.00501996	0.00513088	0.00537856	0.00548366	0.000316209	0.00819602	0.00434741	0.00619853	0.00761052	0.00658812	0.000856505
	C19	0.0136972	0.0084086	0.0203273	0.0226794	0.0162781	0.00323989	0.033693	0.031082	0.0461466	0.0134063	0.031082	0.00674653	0.0375594	0.030134	0.0261084	0.0267343	0.030134	0.00262838	0.0361507	0.00626959	0.0112703	0.00977039	0.0158652	0.0068425	0.0144363	0.0179162	0.00878805	0.0166048	0.0144363	0.00201483	0.00967495	0.0134766	0.00672066	0.00882762	0.00967495	0.00141121	0.0128647	0.0169087	0.00926646	0.0124189	0.0128647	0.00156792	0.00831861	0.00998074	0.00661399	0.0083611	0.00831861	0.000687398
	C21	0.00545324	0.00224293	0.00236815	0.00275392	0.00320456	0.000757406	0.0226071	0.00357717	0.0258853	0.00310346	0.0137933	0.00607277	0.00126626	0.00134866	0.00173975	0.000710377	0.00126626	0.00021213	0.00258342	0.00338243	0.00251029	0.00185755	0.00258342	0.000312338	0.00674731	0.0108776	0.00407745	0.00532976	0.00675802	0.0014775	0.00401721	0.00568114	0.00334357	0.00302693	0.00401721	0.000591826	0.00192248	0.00202043	0.00191585	0.00183117	0.00192248	3.87034e-05	0.00338517	0.00373297	0.00360768	0.00281487	0.00338517	0.000203249
	Subtotal	0.0218145	0.0128671	0.0246401	0.0274712	0.0216982	0.00316207	0.0615936	0.0392063	0.0770445	0.0204306	0.0495687	0.0124363	0.0425996	0.0341825	0.0304274	0.0301493	0.0343397	0.00290283	0.0430817	0.0143177	0.0177638	0.0156822	0.0227113	0.00682697	0.0280277	0.034262	0.0171986	0.0280159	0.0268761	0.00354533	0.0197988	0.0253651	0.0152602	0.0182769	0.0196752	0.00211811	0.0211925	0.0239491	0.0163132	0.0196287	0.0202709	0.00159307	0.0198998	0.0180611	0.0164202	0.0187865	0.0182919	0.000729526
Phthalate ester	C16	0.00213511	0.00159329	0.00224054	0.0016921	0.00191526	0.000160107	0.00515135	0.0025501	0.00355437	0.00345697	0.0036782	0.000540606	0.00191863	0.00189644	0.00209311	0.00169566	0.00190096	8.13427e-05	0.00372632	0.00258462	0.00327482	0.00217332	0.00293977	0.000346951	0.00363913	0.00270575	0.0023302	0.00286162	0.00288418	0.000275257	0.00334435	0.00313518	0.0037046	0.00320946	0.0033484	0.00012638	0.00361262	0.00229756	0.00215155	0.00180768	0.00246735	0.000395325	0.00365239	0.00240534	0.00274763	0.00285428	0.00291491	0.000263819
	C24	0.0139682	0.0135316	0.01504	0.0106113	0.0132878	0.000946767	0.0178137	0.0172762	0.0164489	0.0258516	0.0193476	0.00218608	0.0130817	0.0118108	0.0152002	0.0108045	0.0127243	0.000947706	0.0332188	0.031247	0.0288534	0.027989	0.0303271	0.00118486	0.019575	0.0153897	0.0128252	0.0256174	0.0183518	0.00279287	0.0360261	0.0402646	0.0362701	0.0374997	0.0375151	0.000971559	0.0212561	0.0125172	0.0213184	0.0118994	0.0167478	0.00262392	0.0350095	0.0378913	0.0332761	0.0422577	0.0371086	0.00196257
	Subtotal	0.0161033	0.0151249	0.0172806	0.0123034	0.015203	0.00106226	0.0229651	0.0198263	0.0200033	0.0293086	0.0230258	0.00221452	0.0150003	0.0137073	0.0172933	0.0125002	0.0146253	0.00102542	0.0369451	0.0338317	0.0321283	0.0301623	0.0332668	0.00143711	0.0232141	0.0180955	0.0151554	0.028479	0.021236	0.00293272	0.0393704	0.0433997	0.0399747	0.0407092	0.0408635	0.000888617	0.0248687	0.0148148	0.0234699	0.0137071	0.0192151	0.0028834	0.0386619	0.0402966	0.0360237	0.0451119	0.0400235	0.00191092
Glycols	C16	0.00335916	0.00260038	0.00323703	0.00214706	0.00283591	0.00028353	0.00120145	0.00173738	0.00150562	0.00250507	0.00173738	0.00027843	0.00352751	0.00306215	0.00351788	0.00214107	0.00306215	0.000325659	0	0	0	0	0	0	0.00565377	0.00395848	0.00418919	0.00638641	0.00504696	0.000583302	0	0	0	0	0	0	0.00326482	0.00298165	0.00396738	0.00284543	0.00326482	0.000249944	0	0	0	0	0	0
	C18	0.00307193	0.00310131	0.00472784	0.00468237	0.00389586	0.000467348	0.0112275	0.00877667	0.0131615	0.00900019	0.0105415	0.00103382	0.0123117	0.00749978	0.00501982	0.0051678	0.00749978	0.00170155	0.00265595	0.00217381	0.00318494	0.0026091	0.00265595	0.000207059	0.00266432	0.00224014	0.00212706	0.00248917	0.00238017	0.000121209	0.0033405	0.00429886	0.0029972	0.00272542	0.0033405	0.000343345	0.00342386	0.00312038	0.00304679	0.00259614	0.00304679	0.000170949	0.00323269	0.00217771	0.0026902	0.00250541	0.0026515	0.000220813
	C20	0.00570811	0.00704528	0.00514083	0.00493822	0.00570811	0.000474565	0.00714912	0.00324426	0.00846261	0.0031147	0.00549267	0.00136243	0.0043602	0.00110683	0.00261982	0.00217274	0.0025649	0.000677366	0.00287042	0.00400414	0.00243342	0.00217371	0.00287042	0.00040432	0.0184628	0.0101673	0.00953293	0.0163338	0.0136242	0.00222565	0.00353884	0.00291698	0.0030432	0.00465634	0.00353884	0.000395935	0.0038008	0.00423042	0.00322443	0.00394756	0.0038008	0.000211799	0.0029901	0.00211651	0.0025222	0.00433158	0.0029901	0.000481462
	C22	0.0229038	0.0028945	0.00240653	0.00121842	0.00735581	0.0051946	0.00412337	0.00234667	0.00176907	0.00169832	0.00248436	0.000565302	0.00315266	0.00325647	0.00390891	0.00149524	0.00295332	0.000514035	0.00385058	0.00120904	0.001681	0.00130952	0.00201254	0.000621033	0.00136622	0.0011047	0.00111561	0.00187836	0.00136622	0.00018108	0.00105715	0.00109977	0.000943774	0.00112791	0.00105715	4.04948e-05	0.00162848	0.00136948	0.00153772	0.000942247	0.00136948	0.000152183	0.0036343	0.00394442	0.00500148	0.00319748	0.00394442	0.000384216
	Subtotal	0.035043	0.0156415	0.0155122	0.0129861	0.0197957	0.00511906	0.0237014	0.016105	0.0248988	0.0163183	0.0202559	0.00234811	0.0233521	0.0149252	0.0150664	0.0109769	0.0160802	0.00260266	0.00937696	0.00738699	0.00729936	0.00609232	0.00753891	0.000680165	0.0281471	0.0174707	0.0169648	0.0270878	0.0224176	0.00301168	0.00793649	0.0083156	0.00698418	0.00850968	0.00793649	0.000339013	0.012118	0.0117019	0.0117763	0.0103314	0.0114819	0.000394058	0.00985708	0.00823863	0.0102139	0.0100345	0.00958602	0.000454995
β-Tocopherol	β-Tocopherol	0.0497327	0.0340355	0.0498889	0.0413512	0.0437521	0.00380357	0.0223525	0.0163082	0.0196444	0.0193983	0.0194259	0.00123606	0.00848258	0.0110136	0.0181932	0.0173466	0.013759	0.00237893	0.00752657	0.0078294	0.00924845	0.00782749	0.00810798	0.00038676	0.0413404	0.0595915	0.051905	0.0750208	0.0569644	0.00708661	0.0307625	0.0325805	0.0247968	0.0344668	0.0306516	0.00209299	0.00877932	0.0159023	0.0116876	0.0130052	0.0123436	0.00147864	0.011882	0.0142903	0.0154684	0.016319	0.0144899	0.000963675
Triterpenoids	α-Amyrin	0.00114264	0.000750343	0.00137424	0.00130333	0.00114264	0.00013945	0.00119773	0.00157232	0.001588	0.00107897	0.00135926	0.000129863	0.000733673	0.000516593	0.000625133	0.000625133	0.000625133	4.43113e-05	0.00463903	0.00533827	0.0121762	0.0109871	0.00828516	0.00192396	0	0	0	0	0	0	0.00114416	0.00111087	0.00118247	0.00107996	0.00112937	2.20263e-05	0	0	0	0	0	0	0.00592848	0.00881911	0.00271322	0.00433324	0.00544852	0.00130118
	β-Amyrin	0.0272925	0.025173	0.0378739	0.0516293	0.0354922	0.00605392	0.042915	0.040881	0.0571283	0.0479971	0.0472304	0.00362277	0.0222374	0.0116608	0.0322752	0.0334827	0.024914	0.00508612	0.0605667	0.0871532	0.114822	0.0761408	0.0846706	0.0114346	0.0715844	0.0737868	0.0799355	0.0751022	0.0751022	0.00176696	0.0486905	0.066073	0.0763239	0.104954	0.0740103	0.0117861	0.023107	0.0271348	0.0303953	0.0437926	0.0311074	0.00448339	0.061287	0.0734075	0.0558216	0.102875	0.0733479	0.010506
	Lupeol	0	0	0	0	0	0	0	0	0	0	0	0	0	0	0	0	0	0	0.00603517	0.00360905	0.00662074	0.00787572	0.00603517	0.000895199	0	0	0	0	0	0	0.00122748	0.00153798	0.00126233	0.00149624	0.00138101	7.93585e-05	0	0	0	0	0	0	0.0123032	0.0150634	0.00852273	0.0131152	0.0122511	0.00137111
	Friedelin	0.00844111	0.00555539	0.00569053	0.00660136	0.0065721	0.000664889	0.0202215	0.00695805	0.0130286	0.0075382	0.0119366	0.00308172	0.00682097	0.00616599	0.00719697	0.0032561	0.00586001	0.000893722	0.0736572	0.013368	0.027429	0.0250572	0.0348779	0.0132867	0.00673043	0.00573043	0.00499465	0.00399465	0.00536254	0.000578282	0.0426025	0.0369672	0.0531976	0.0397555	0.0431307	0.00354733	0.00563651	0.00563685	0.00651734	0.00475532	0.00563651	0.00035967	0.1304	0.157947	0.112853	0.159588	0.140197	0.0113091
	Ursolic acid	0	0	0	0	0	0	0.000547215	0.00250254	0.00138709	0.000892004	0.00133221	0.000426485	0	0	0	0	0	0	0.0125807	0.00859233	0.0153467	0.0138031	0.0125807	0.00144488	0	0	0	0	0	0	0.000907252	0.00115224	0.00124786	0.00105957	0.00109173	7.25161e-05	0	0	0	0	0	0	0.010085	0.0134914	0.00571264	0.00595807	0.00881179	0.00185446
	Betulin	0	0	0	0	0	0	0.0109991	0.00762464	0.00224195	0.000524685	0.0053476	0.00241575	0.00383076	0.00316582	0.00353675	0.00361367	0.00353675	0.000138428	0.0282826	0.0246901	0.0295695	0.0305881	0.0282826	0.00128702	0	0	0	0	0	0	0.00123873	0.00140507	0.00101984	0.00129126	0.00123873	8.07972e-05	0	0	0	0	0	0	0.018114	0.0131872	0.0156506	0.0156506	0.0156506	0.00100567
	Subtotal	0.0368763	0.0314787	0.0449387	0.059534	0.0432069	0.00610464	0.0758806	0.0595385	0.075374	0.058031	0.067206	0.00487284	0.0336228	0.0215092	0.0436341	0.0409776	0.0349359	0.00495111	0.185761	0.142751	0.205964	0.164452	0.174732	0.0136184	0.0783149	0.0795172	0.0849301	0.0790969	0.0804648	0.00150916	0.0958106	0.108246	0.134234	0.149636	0.121982	0.0122082	0.0287435	0.0327716	0.0369126	0.0485479	0.0367439	0.00427345	0.238117	0.281916	0.201274	0.301521	0.255707	0.0224687
Steroids	24-methylenecycloartanol	0.00161376	0.00161031	0.00170094	0.00151622	0.00161031	3.77256e-05	0.00127013	0.000704598	0.000962383	0.000938833	0.000968985	0.000116024	0.000711532	0.000540342	0.00186653	0.00204069	0.00128977	0.000386493	0.000559563	0.000659226	0.000871488	0.000546626	0.000659226	7.50925e-05	0	0	0	0	0	0	0.000997525	0.0008013	0.000899412	0.000899412	0.000899412	4.00543e-05	0.000746112	0.00113107	0.000938589	0.000938589	0.000938589	7.85785e-05	0	0	0	0	0	0
	Lanosterol	0.00103954	0.00131196	0.0010232	0.00078347	0.00103954	0.000108032	0.00454837	0.000926677	0.0049006	0.000721802	0.00277436	0.00112897	0	0	0	0	0	0	0.00522337	0.000561405	0.000587741	0.00105923	0.00185793	0.00112762	0.00136136	0.00176136	0.00206136	0.00161358	0.00169941	0.000146199	0.00130287	0.00118343	0.00110972	0.00161547	0.00130287	0.000111539	0	0	0	0	0	0	0.0135065	0.00938371	0.00756724	0.00742246	0.00946998	0.00141756
	Stigmasterol	0.0144406	0.0186072	0.0148688	0.00984588	0.0144406	0.00179479	0.00762766	0.00592184	0.00485325	0.00415536	0.00563952	0.00075572	0.014186	0.0109248	0.0153283	0.00934438	0.0124459	0.00139252	0.00467592	0.00398228	0.00662434	0.00580621	0.00527219	0.000586862	0	0	0	0	0	0	0.000753869	0.00076157	0.000753869	0.000746168	0.000753869	3.1439e-06	0	0	0	0	0	0	0.00750091	0.0113352	0.00400998	0.00583893	0.00717127	0.00156035
	Campesterol	0.00184593	0.00162777	0.0014841	0.00155329	0.00162777	7.84118e-05	0.00341352	0.00788101	0.00717171	0.00405104	0.00562932	0.00111242	0	0	0	0	0	0	0.0231081	0.0270378	0.0613	0.0650645	0.0441276	0.0110571	0	0	0	0	0	0	0.00157384	0.00218286	0.00143153	0.00139739	0.00164641	0.000182853	0	0	0	0	0	0	0.0157251	0.0177887	0.00720089	0.0136676	0.0135956	0.00229154
	Subtotal	0.0189398	0.0231572	0.019077	0.0136989	0.0187182	0.00193813	0.0168597	0.0154341	0.0178879	0.00986704	0.0150122	0.00178731	0.0148976	0.0114652	0.0171948	0.0113851	0.0137357	0.0014141	0.033567	0.0322407	0.0693835	0.0724766	0.0519169	0.0109987	0.00136136	0.00176136	0.00206136	0.00161358	0.00169941	0.000146199	0.00462811	0.00492916	0.00419453	0.00465845	0.00460256	0.000151913	0.000746112	0.00113107	0.000938589	0.000938589	0.000938589	7.85785e-05	0.0367325	0.0385076	0.0187781	0.026929	0.0302368	0.00459025
Not identified	Not identified 1	0.00104774	0.000888473	0.00267266	0.00283241	0.00186032	0.000517175	0.0022586	0.00115997	0.00288516	0.00267232	0.00224401	0.000384044	0.0021687	0.00309492	0.00354905	0.003567	0.00309492	0.000327488	0.00201732	0.00173616	0.00244681	0.00258714	0.00219686	0.000195636	0.00347026	0.00232328	0.00219569	0.00378502	0.00294356	0.000400992	0.00258846	0.00329556	0.00233441	0.00318574	0.00285104	0.000231926	0.00233615	0.0031974	0.00255907	0.00314797	0.00281015	0.000214437	0.00254646	0.00249451	0.00295301	0.0038546	0.00296214	0.000314647
	Not identified 2	0.000905156	0.000835796	0.000920108	0.000682124	0.000835796	5.4417e-05	0	0	0	0	0	0	0	0	0	0	0	0	0.00483452	0.00146171	0.00273964	0.00270894	0.0029362	0.000699286	0	0	0	0	0	0	0.00243381	0.00212874	0.00238178	0.00258279	0.00238178	9.44888e-05	0	0	0	0	0	0	0.00753516	0.011062	0.00686541	0.00923203	0.00867366	0.000939065
	Not identified 3	0.001613	0.00164328	0.00162689	0.00159912	0.00162057	9.45554e-06	0.00258864	0.000941136	0.00247707	0.000977688	0.00174613	0.000454845	0	0	0	0	0	0	0.0147656	0.0127106	0.0154657	0.00740242	0.0125861	0.0018241	0	0	0	0	0	0	0.00136251	0.00180269	0.0019753	0.00177332	0.00172846	0.000129863	0	0	0	0	0	0	0.0116532	0.0162294	0.00804534	0.00725237	0.0107951	0.00204898
	Not identified 4	0	0	0	0	0	0	0	0	0	0	0	0	0	0	0	0	0	0	0.00156139	0.00955003	0.0144192	0.0071625	0.00817328	0.00267154	0	0	0	0	0	0	0.00188928	0.0037056	0.00261533	0.0022511	0.00261533	0.000392482	0	0	0	0	0	0	0.02264	0.0213477	0.0104425	0.0135632	0.0169983	0.00296544
	Not identified 5	0.0416776	0.0361963	0.0533581	0.0273368	0.0396422	0.0054434	0.0690773	0.061049	0.0515742	0.031412	0.0532781	0.00811908	0.0567282	0.0579735	0.0667336	0.0300049	0.0528601	0.00793696	0.0683686	0.0516029	0.0528114	0.0473202	0.0550258	0.00460096	0	0	0	0	0	0	0.00671005	0.0102078	0.00901763	0.0108076	0.00918577	0.000905183	0	0	0	0	0	0	0.0510542	0.066424	0.0402199	0.0392566	0.0492387	0.00632201
	Not identified 6	0.00123311	0.00123311	0.00162563	0.000840597	0.00123311	0.000160245	0.00204312	0.00532099	0.00532599	0.00216591	0.003714	0.000929576	0	0	0	0	0	0	0.0110718	0.0248505	0.0454069	0.0428555	0.0310462	0.00807802	0	0	0	0	0	0	0.00472056	0.00655664	0.00694688	0.00550135	0.00593136	0.000506064	0	0	0	0	0	0	0.0279879	0.0493506	0.0190022	0.00795131	0.026073	0.00877451
	Not identified 7	0	0	0	0	0	0	0.00138171	0.0115318	0.00907148	0.00575244	0.00693435	0.0021972	0	0	0	0	0	0	0.0267554	0.0559311	0.0898964	0.0921243	0.0661768	0.015532	0.0330234	0.0393332	0.03506	0.024677	0.0330234	0.00307712	0.0364268	0.0323721	0.0368652	0.0400432	0.0364268	0.00157352	0.0411227	0.0355714	0.052139	0.0356577	0.0411227	0.0038949	0.101331	0.0774857	0.0659626	0.0616202	0.0766	0.00889747
	Not identified 8	0.00504229	0.00504229	0.00515055	0.00493404	0.00504229	4.41956e-05	0.00225844	0.0145311	0.0105554	0.00623415	0.00839478	0.0026559	0	0	0	0	0	0	0.0297852	0.052755	0.088055	0.0691164	0.0599279	0.012368	0	0	0	0	0	0	0.0053351	0.00902989	0.0112582	0.00846294	0.00852153	0.00122149	0	0	0	0	0	0	0.0330619	0.0345701	0.0409071	0.0377084	0.0365619	0.00174195
	Not identified 9	0.00420982	0.00420982	0.00524756	0.00317208	0.00420982	0.000423655	0.000779103	0.0110532	0.00692918	0.00294948	0.00542774	0.00226664	0	0	0	0	0	0	0.0387188	0.0309112	0.0447463	0.0404988	0.0387188	0.00289336	0.00212066	0.000978128	0.00187132	0.00251517	0.00187132	0.000325897	0.0193346	0.0257937	0.019397	0.0243406	0.0222165	0.00167239	0.00139887	0.00190087	0.00164987	0.00164987	0.00164987	0.000102469	0.141522	0.18003	0.0965623	0.14786	0.141494	0.0171863
	Not identified 10	0.00607682	0.00137044	0.00607682	0.0107832	0.00607682	0.00192137	0.00615199	0.0172167	0.0123152	0.004845	0.0101322	0.00286867	0.0224148	0.0224148	0.0183239	0.0265057	0.0224148	0.0016701	0.0566395	0.0461384	0.0629141	0.060866	0.0566395	0.00373617	0	0	0	0	0	0	0.00553656	0.00731093	0.00609776	0.00700091	0.00648654	0.000408023	0	0	0	0	0	0	0.0483737	0.0639786	0.0281557	0.0302903	0.0426996	0.00841875
	Not identified 11	0.00909182	0.00909182	0.0119257	0.0062579	0.00909182	0.00115694	0.0151113	0.0269729	0.0196115	0.00767468	0.0173426	0.00404494	0.0131367	0.00725057	0.0101936	0.0101936	0.0101936	0.0012015	0.0310212	0.0476436	0.0637847	0.0638151	0.0515661	0.00783587	0	0	0	0	0	0	0.0224385	0.0333968	0.0271409	0.0332685	0.0290612	0.00264648	0.00127536	0.00187921	0.000988833	0.00117468	0.00132952	0.000192599	0.176338	0.243965	0.141951	0.192538	0.188698	0.0212273
	Not identified 12	0	0	0	0	0	0	0.00748505	0.00800304	0.00852102	0.00800304	0.00800304	0.000211467	0	0	0	0	0	0	0.0115098	0.00660059	0.00611603	0.00652548	0.00768798	0.00127839	0	0	0	0	0	0	0.000991164	0.000945839	0.000991164	0.00103649	0.000991164	1.85041e-05	0	0	0	0	0	0	0.00179366	0.00216402	0.00159687	0.00162007	0.00179366	0.000131031
	Subtotal	0.0708974	0.0605113	0.0886041	0.0584383	0.0696127	0.00689218	0.109135	0.15778	0.129266	0.0726867	0.117217	0.0178857	0.0944484	0.0907338	0.0988002	0.0702712	0.0885634	0.00631624	0.297049	0.341892	0.488802	0.442983	0.392681	0.044248	0.0386143	0.0426346	0.039127	0.0309772	0.0378383	0.00245531	0.109767	0.136546	0.127021	0.140254	0.128397	0.00680663	0.0461331	0.0425489	0.0573368	0.0416302	0.0469122	0.00360807	0.625838	0.769102	0.462664	0.552747	0.602588	0.0647626
Caffeine	Caffeine	0.00228231	0.00199175	0.00278415	0.00152342	0.00214541	0.000264137	0.00635658	0.00821646	0.0079172	0.00461665	0.00677672	0.000827445	0.00419364	0.00246711	0.00302279	0.0021996	0.00297079	0.000442201	0.0535611	0.0690861	0.0487389	0.104566	0.068988	0.0126287	0.00484242	0.00650321	0.0039957	0.00470593	0.00501182	0.000530645	0.0186657	0.0211813	0.0185847	0.0162312	0.0186657	0.00101084	0.00690033	0.00682051	0.00817007	0.00539114	0.00682051	0.000567947	0.0593334	0.0737529	0.06373	0.0939169	0.0726833	0.00769411
Coverage	Coverage	0.58405	0.467399	0.628792	0.558349	0.559647	0.0340195	0.574219	0.515937	0.605915	0.435214	0.532821	0.0374929	0.386119	0.3776	0.495507	0.472091	0.432829	0.0298638	0.807389	0.775594	1.04467	0.995911	0.90589	0.0671082	0.59044	0.614258	0.570323	0.72232	0.624335	0.0338734	0.542363	0.64577	0.575044	0.68883	0.613002	0.0332343	0.285866	0.343891	0.317758	0.34798	0.323874	0.0143289	1.19737	1.41544	0.959056	1.24332	1.2038	0.0941165
[truncated: 120 more columns]
